# Supplementary material
Source: PubMed Central journal article supplement (PMC2745664)
Supplement: neo1110_0976SD1.pdf [file neo1110_0976SD1.pdf]

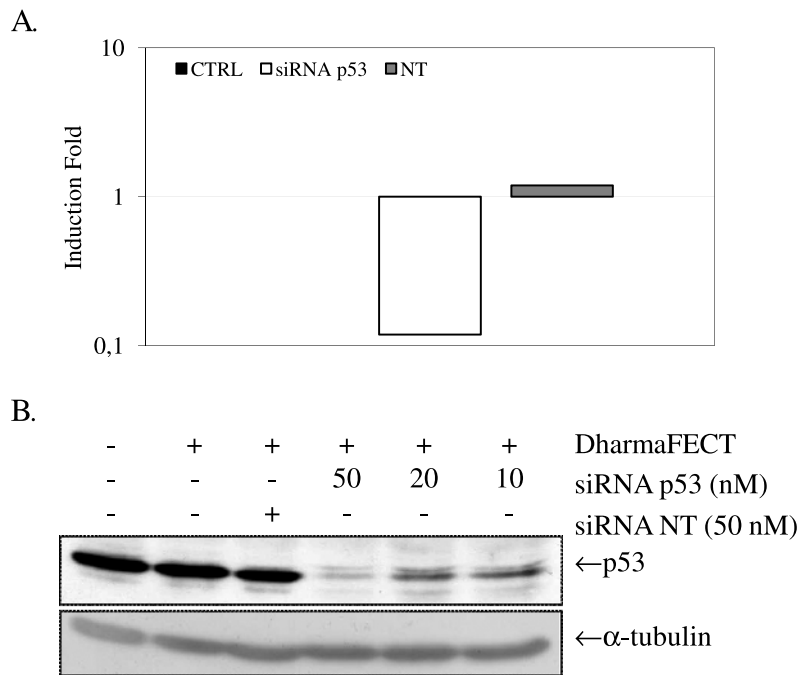

**Figure W1.** Effect of p53 siRNA on the p53 mRNA and protein levels. HepG2 cells were transfected with p53 siRNA or negative control siRNA during 24 hours. Twenty-four hours after the end of the transfection, total RNA was extracted, submitted to reverse transcription, and then to amplification in the presence of SYBR Green and specific primers (A). *RPL13A* was used as the housekeeping gene for data normalization. At the same time, total protein extracts were prepared and were analyzed by Western blot analysis for p53 using a specific anti-p53 antibody (B).  $\alpha$ -Tubulin was used to assess the total amount of proteins loaded on the gel.

A.

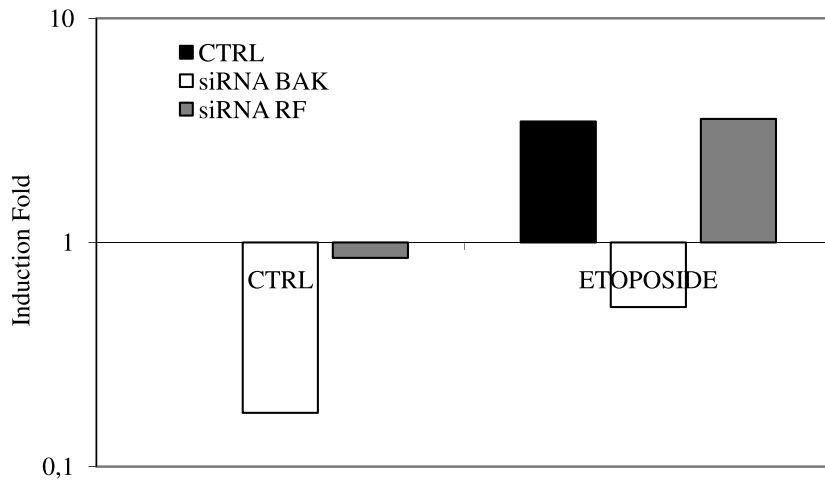

B.

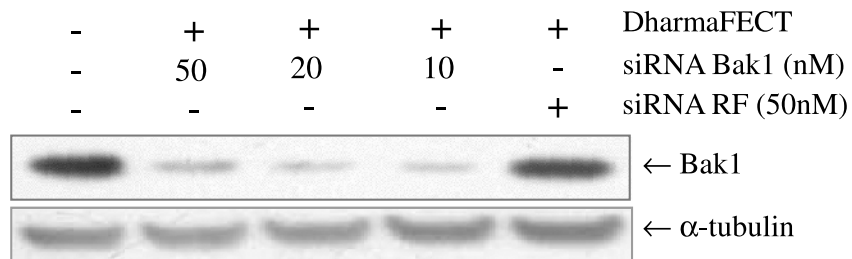

**Figure W2.** Effect of Bak1 siRNA on the Bak1 mRNA and protein levels. HepG2 cells were transfected with Bak1 siRNA or negative control siRNA during 24 hours. Eight hours later, cells were incubated with (Ne; 50  $\mu$ M) or without etoposide (Nx) for 16 hours. At the end of the incubation, total RNA was extracted, submitted to reverse transcription, and then to amplification in the presence of SYBR Green and specific primers (A). *RPL13A* was used as the housekeeping gene for data normalization. At the same time, total protein extracts were prepared and were analyzed by Western blot analysis for Bak1 using a specific anti-Bak1 antibody (B).  $\alpha$ -Tubulin was used to assess the total amount of proteins loaded on the gel.

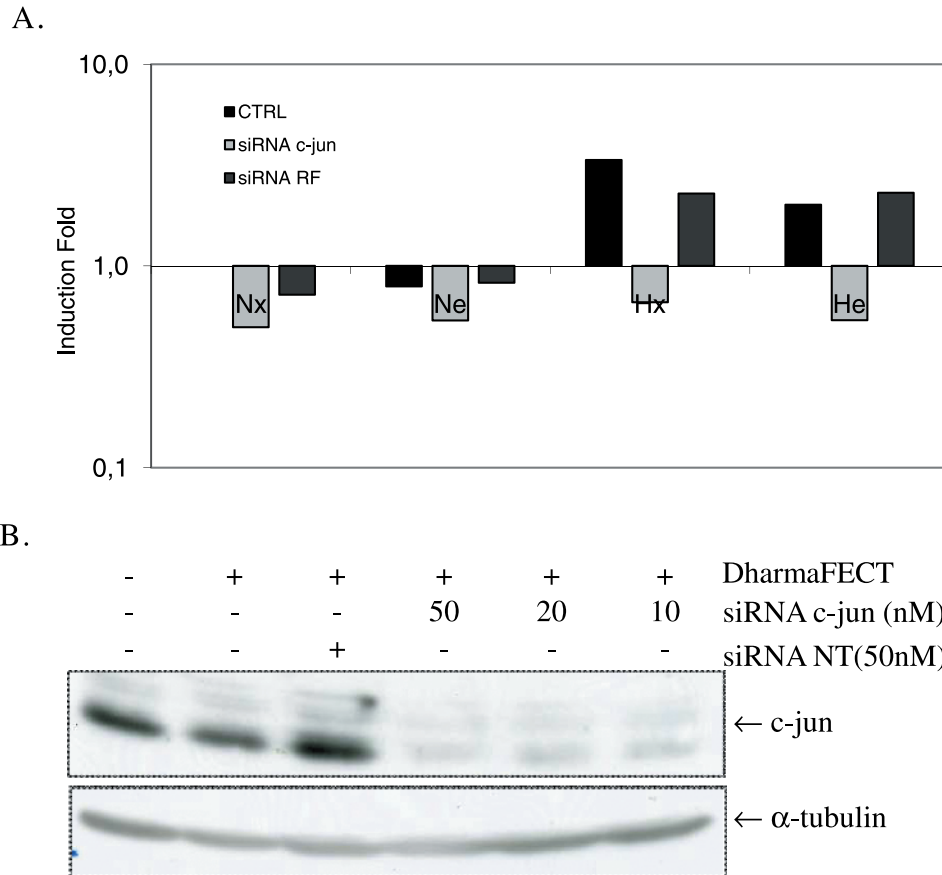

**Figure W3.** Effect of c-jun siRNA on the c-jun mRNA and protein levels. HepG2 cells were transfected with c-jun siRNA or negative control siRNA during 24 hours. Eight hours later, cells were incubated under normoxic (Nx; 21% O<sub>2</sub>) or hypoxic (Hx; 1% O<sub>2</sub>) conditions with (Ne-He; 50  $\mu$ M) or without etoposide (Nx-Hx) for 16 hours. At the end of the incubation, total RNA was extracted, submitted to reverse transcription, and then to amplification in the presence of SYBR Green and specific primers (A). *RPL13A* was used as the housekeeping gene for data normalization. At the same time, total protein extracts were prepared and were analyzed by Western blot analysis for c-jun using a specific anti-c-jun antibody (B).  $\alpha$ -Tubulin was used to assess the total amount of proteins loaded on the gel.
